# Supplementary material
Source: PubMed Central journal article supplement (PMC5621892)
Supplement: jciinsight-2-94904-s001.pdf [file jciinsight-2-94904-s001.pdf]

## ONLINE DATA SUPPLEMENTS

### Wnt11 Regulates Cardiac Chamber Development and Disease during Perinatal Maturation

#### Authors and Affiliations:

Marlin Touma, MD, PhD<sup>1,2</sup>; Xuedong Kang, PhD<sup>1,2</sup>; Fuying Gao, PhD<sup>3</sup>; Yan Zhao, PhD<sup>1,2</sup>; Ashley A. Cass, BS<sup>4</sup>; Reshma Biniwale, MD<sup>5</sup>; Xinshu Xiao, PhD<sup>4</sup>; Mansuoreh Eghbali, PhD<sup>6</sup>; Giovanni Coppola, MD<sup>3</sup>; Brian Reemtsen, MD<sup>5</sup>, Yibin Wang, PhD<sup>2,7</sup>.

1) The Children's Discovery and Innovation Institute (CDI), Department of Pediatrics, University of California, Los Angeles, CA.

2) Cardiovascular Research Laboratory, University of California, Los Angeles, CA

3) Department of Neurology, University of California, Los Angeles, CA

4) Bioinformatics interdepartmental program, University of California, Los Angeles, CA

5) Department of Cardiothoracic Surgery, University of California, Los Angeles, CA.

6) Department of Anesthesiology, University of California, Los Angeles, CA

7) Department of Anesthesiology, Physiology and Medicine, University of California, Los Angeles, CA.

#### Correspondence:

Marlin Touma, MD, PhD

David Geffen School of Medicine, University of California, Los Angeles

10833 Le Conte Ave, B2-375, MDCC, Los Angeles, CA 90095. USA.

Tel: 310-206-6197 / Fax: 310-267-0154 / E-mail [mtouma@mednet.ucla.edu](mailto:mtouma@mednet.ucla.edu)

#### Conflict of interest statement:

The authors have declared that no conflict of interest exists.

## Supplemental Tables

### **Supplemental Table 1. Please refer to Related (EXCEL File A).**

Top 50 stage specific 9 significantly differentially expressed mRNAs (RPKM $\geq$ 3, V $\geq$ 0.2, FDR P $\leq$ 0.05 and fold change  $\geq$ 2) 10 in neonatal heart during maturation. Pair wise differential expression analysis of mRNAs 11 expressed during neonatal heart maturation in left ventricle (LVP0 vs LVP3; LVP3 vs LVP7), and 12 right ventricle (RVP0 vs RVP3; RVP3 vs RVP7). 13 LVP0-rep1, LVP0-rep2, LVP0-rep3: Left Ventricle at postnatal day0-replicate1, replicate2, and 14 replicate 3, respectively. 15 LVP3-Rep1, LVP3-rep2, LVP3-rep3: Left Ventricle at postnatal day3-replicate1, replicate2, and 16 replicate3, respectively. 17 LVP7-rep1, LVP7-rep2, LVP7-rep3: Left Ventricle at postnatal day7-replicate1, replicate2, and 18 replicate3, respectively. 19 RVP0, RVP3, RVP7: Right Ventricle at postnatal day 0, 3, and 7, respectively.

**Supplemental Table 2.** Significant stage specific modules in neonatal left ventricle (LV) revealed by weighted gene co-expression network analysis (WGCNA).

| <b>Left Ventricle (LV) Modules Revealed by Weighted Gene Co-expression Network Analysis</b> |                    |                     |                      |                      |                      |
|---------------------------------------------------------------------------------------------|--------------------|---------------------|----------------------|----------------------|----------------------|
| <b>Module Color</b>                                                                         | <b>Module Size</b> | <b>p.value.Time</b> | <b>p.value.LV_P0</b> | <b>p.value.LV_P3</b> | <b>p.value.LV_P7</b> |
| brown                                                                                       | 219                | 3.33E-05            | 0.021888924          | 0.67425277           | 0.000758989          |
| cyan                                                                                        | 1634               | 0.994963038         | 0.173511544          | 0.002543681          | 0.328500492          |
| pink                                                                                        | 1045               | 0.019853373         | 7.72E-05             | 0.147050452          | 0.251451916          |
| purple                                                                                      | 92                 | 0.286730252         | 0.004882449          | 0.0031329            | 0.958761725          |
| grey60                                                                                      | 822                | 0.756091844         | 0.55695259           | 0.1004625            | 0.349144182          |
| midnightblue                                                                                | 67                 | 0.512539829         | 0.49305988           | 0.004132801          | 0.100603739          |
| lightcyan                                                                                   | 75                 | 0.800585542         | 0.746169516          | 0.325570997          | 0.525592981          |
| lightgreen                                                                                  | 60                 | 0.318577882         | 0.55014189           | 0.665939343          | 0.28781664           |
| salmon                                                                                      | 174                | 0.753176768         | 0.525053659          | 0.529883208          | 0.994371702          |
| black                                                                                       | 89                 | 0.064224191         | 0.402092304          | 0.270636549          | 0.025149758          |
| green                                                                                       | 217                | 0.01326623          | 0.107317322          | 0.635993579          | 0.018412887          |
| magenta                                                                                     | 131                | 0.175741321         | 0.968569962          | 0.013289477          | 0.016564021          |
| red                                                                                         | 258                | 0.012136265         | 0.341377604          | 0.11335335           | 0.000363406          |
| tan                                                                                         | 109                | 0.102369278         | 0.004635348          | 0.09524439           | 0.515245494          |
| yellow                                                                                      | 110                | 0.021240161         | 0.013158504          | 0.548068665          | 0.126626096          |
| blue                                                                                        | 2339               | 0.00037393          | 5.69E-05             | 0.485590175          | 0.040569686          |
| turquoise                                                                                   | 722                | 3.38E-05            | 0.013924717          | 0.788688235          | 0.001708139          |

**Supplemental Table 3.** Significant stage specific modules in neonatal right ventricle (RV) revealed by weighted gene co-expression network analysis (WGCNA).

| <b>Right Ventricle (RV) Modules Revealed by Weighted Gene Co-expression Network Analysis</b> |             |              |               |               |               |
|----------------------------------------------------------------------------------------------|-------------|--------------|---------------|---------------|---------------|
| Module Color                                                                                 | Module Size | p.value.Time | p.value.RV_P0 | p.value.RV_P3 | p.value.RV_P7 |
| black                                                                                        | 368         | 0.166308201  | 0.010568318   | 0.054810654   | 0.722584196   |
| blue                                                                                         | 862         | 0.681954921  | 0.541986642   | 0.058804766   | 0.223203098   |
| brown                                                                                        | 541         | 0.009092214  | 0.021215545   | 0.64167879    | 0.076337415   |
| cyan                                                                                         | 157         | 0.001302704  | 0.000439121   | 0.374275983   | 0.083119351   |
| darkgreen                                                                                    | 113         | 5.67E-06     | 0.040231158   | 0.801175963   | 0.000671459   |
| darkgrey                                                                                     | 103         | 0.075408331  | 9.40E-05      | 0.026212228   | 0.59685051    |
| darkmagenta                                                                                  | 57          | 0.534355808  | 0.033776596   | 0.000502747   | 0.603773269   |
| darkolivegreen                                                                               | 62          | 0.00794506   | 0.002123803   | 0.334893289   | 0.140502601   |
| darkorange                                                                                   | 95          | 0.171628523  | 0.022236465   | 0.103688768   | 0.663200911   |
| darkred                                                                                      | 115         | 0.033006603  | 0.008117146   | 0.283619891   | 0.249776119   |
| darkturquoise                                                                                | 105         | 0.32088667   | 0.177365054   | 0.380663931   | 0.654056941   |
| green                                                                                        | 400         | 0.875072308  | 0.454762447   | 0.089857881   | 0.374411173   |
| greenyellow                                                                                  | 237         | 0.573016334  | 0.869989382   | 0.259810902   | 0.289413135   |
| grey60                                                                                       | 143         | 0.436428243  | 0.643795156   | 0.794793956   | 0.408153864   |
| lightcyan                                                                                    | 148         | 0.638291587  | 0.666040176   | 0.92273389    | 0.709595298   |
| lightgreen                                                                                   | 137         | 0.849764846  | 0.343099214   | 0.019502812   | 0.262235497   |
| lightyellow                                                                                  | 117         | 0.333852907  | 0.65878714    | 0.004116759   | 0.024305532   |
| magenta                                                                                      | 281         | 0.980778671  | 0.17666186    | 0.001533364   | 0.289663715   |
| midnightblue                                                                                 | 151         | 0.648852332  | 0.674557536   | 0.132545629   | 0.26412876    |
| orange                                                                                       | 99          | 0.350687998  | 0.838571024   | 0.060186661   | 0.068786358   |
| paleturquoise                                                                                | 76          | 0.88744182   | 0.19979018    | 0.016441711   | 0.423479254   |

## Supplemental Figure Legends

### **Supplemental Figure 1. Preserved Stage Specific Modules in Left and Right Ventricles Suggest Coordinated Metabolic Switch from Glucose Metabolism at P0 to Fatty Acid Metabolism at P3 in Both Ventricles.**

Quantitative RT-PCR validation of genes involved in fatty acid metabolism and glucose metabolism reveals synchronized downregulation of glucose metabolism and induction of fatty acid metabolism genes at P3 in both ventricles. For each gene, the mean expression ratio (P3/P0 ratio) is presented in Y Axis. RV data are presented in blue; LV data are presented in pink. N =3 per group per time point.

**Supplemental Figure 2. Expression Patterns of Representative Proliferation Genes in Neonatal Heart Left and Right Ventricles (RNA-seq data).** RPKM measures of RV data are presented in blue, and of LV data are presented in pink.

**Supplemental Figure 3. Chamber specific Regulation of Wnt11. A.** Dosimetry quantitative analysis of Wnt11 protein expression in LV and RV of hypoxia exposed wild type P3-neonatal mouse compared to baseline normoxia control. **B.** Dosimetry quantitative analysis of Wnt11 protein expression in LV and RV of wild type P3-neonatal mouse at P0 and P7. Error bars represent standard error of means (SEM). \*P ≤0.05, \*\*P≤0.01, \*\*\*P≤0.005. Statistics (A,B): Tow tailed Student's *t* test. This figure is related to Figure 3. G, and Figure 5. C.

**Supplemental Figure 4. Wnt11 Knockdown by Vivo-Morpholino did not Impact Cardiac Function.**

Representative M-mode echocardiography images of Mor-Wnt11 treated or scramble treated neonatal mouse hearts are displayed. Bar graphs (right): Quantitative analysis of left ventricle

(LV) functional indices. N=7 per group. EF: Ejection fraction, FS: Fractional shortening. Error bars represent standard error of means (SEM). \*  $P \leq 0.05$  (unpaired, two tailed Student's  $t$  test).

Fatty Acid Metabolism (LV)  
Glucose Metabolism (LV)

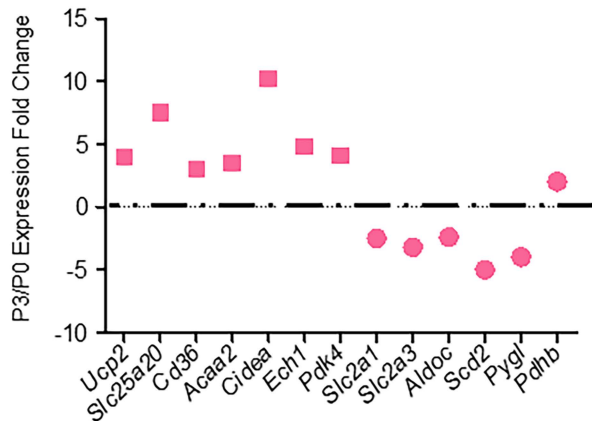

Fatty Acid Metabolism (RV)  
Glucose Metabolism (RV)

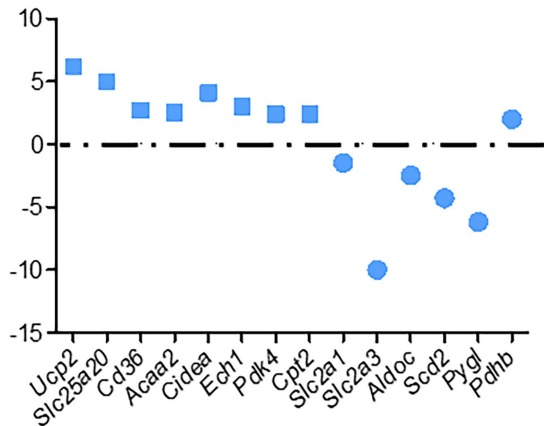

**Supplemental Figure 1. Preserved Stage Specific Modules in Left and Right Ventricles Suggest Coordinated Metabolic Switch from Glucose Metabolism at P0 to Fatty Acid Metabolism at P3 in Both Ventricles.**

Quantitative RT-PCR validation of genes involved in fatty acid metabolism and glucose metabolism reveals synchronized downregulation of glucose metabolism and induction of fatty acid metabolism genes at P3 in both ventricles. For each gene, the mean expression ratio (P3/P0 ratio) is presented in Y Axis. RV data are presented in blue; LV data are presented in pink. N =3 per group per time point.



# RNA-Seq expression data

## *Ki67*

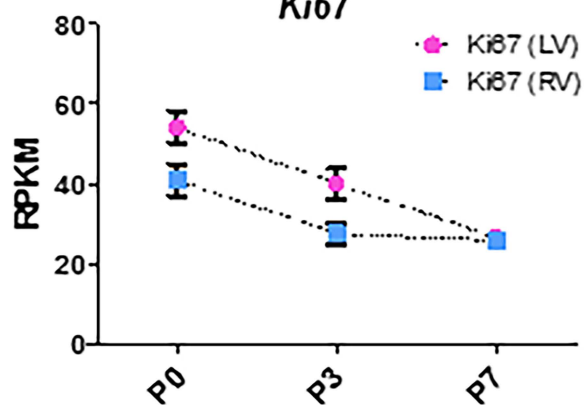

## *Aurkb*

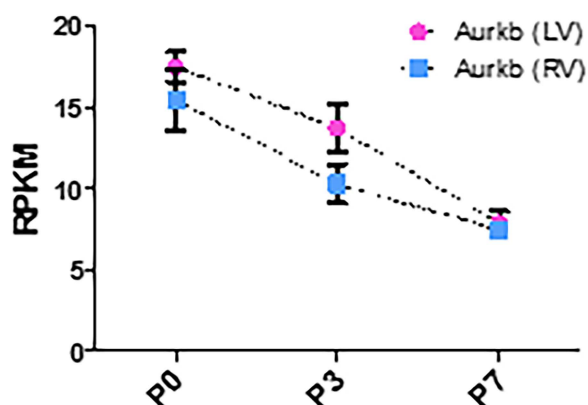

## *Pcna*

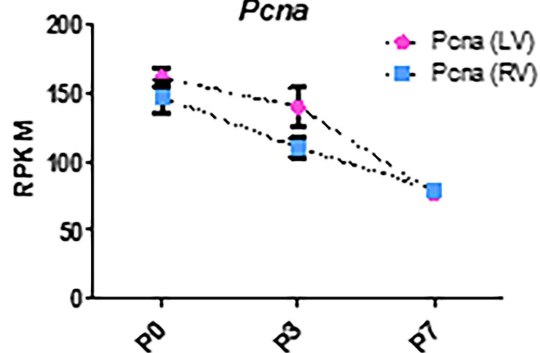

## *Plk1*

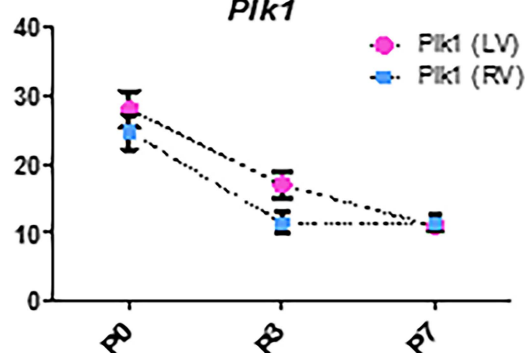

## *Ccnb1*

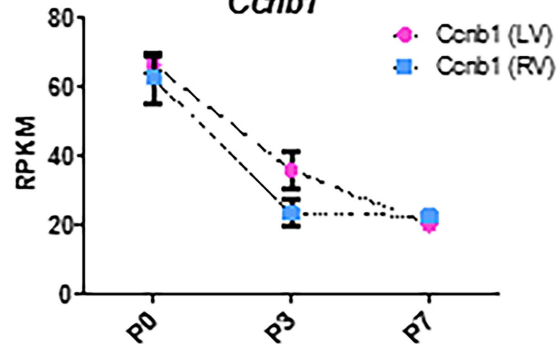

## *Ccnb2*

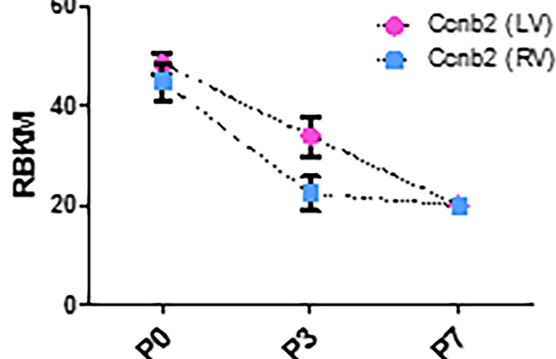

## *Cdc25c*

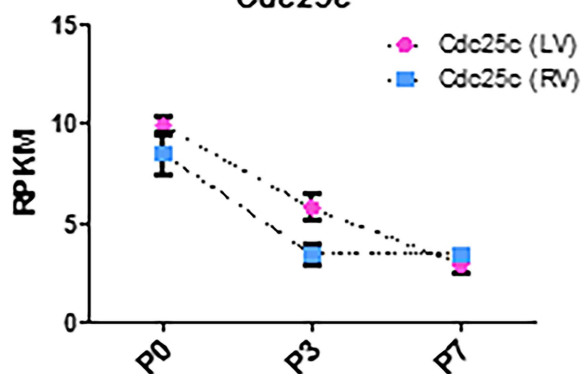

## *Cdk1*

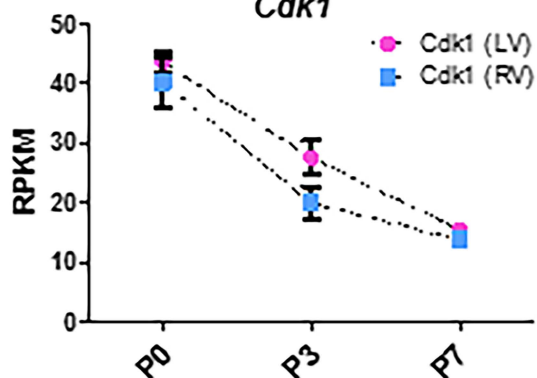

**Supplemental Figure 2. Expression Patterns of Representative Proliferation Genes in Neonatal Heart Left and Right Ventricles (RNA-seq data).** RPKM measures of RV data are presented in blue, and of LV data are presented in pink.

**A**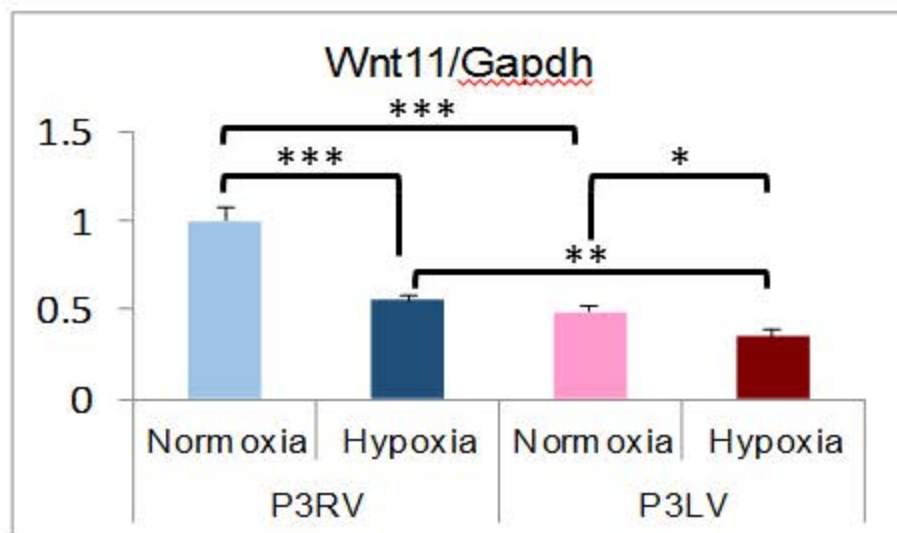**B**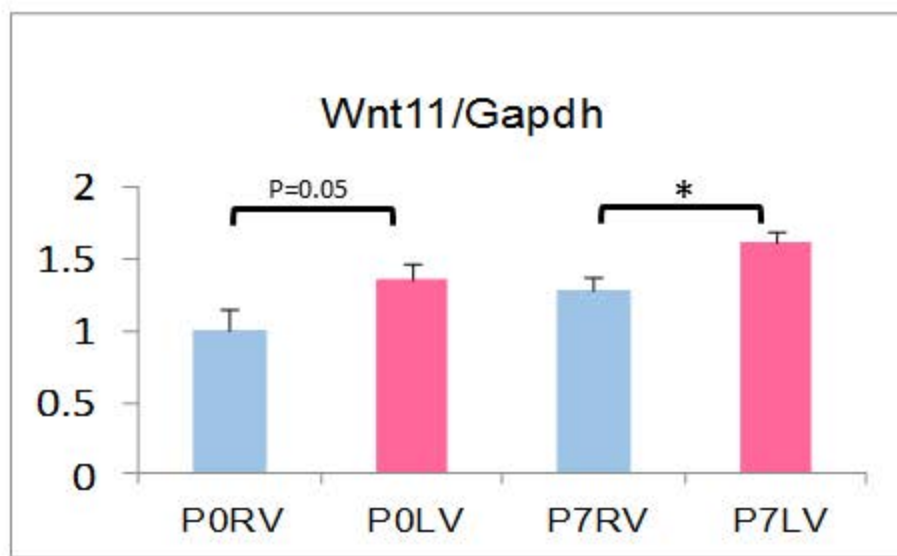

**Supplemental Figure 3. Chamber specific Regulation of Wnt11.** **A.** Dosimetry quantitative analysis of Wnt11 protein expression in LV and RV of hypoxia exposed wild type P3-neonatal mouse compared to baseline normoxia control. **B.** Dosimetry quantitative analysis of Wnt11 protein expression in LV and RV of wild type P3-neonatal mouse at P0 and P7. Error bars represent standard error of means (SEM). \*P  $\leq$ 0.05, \*\*P $\leq$ 0.01, \*\*\*P $\leq$ 0.005. Statistics (A, B): Tow tailed Student's *t* test. This figure is related to Figure 3. G, and Figure 5. C.

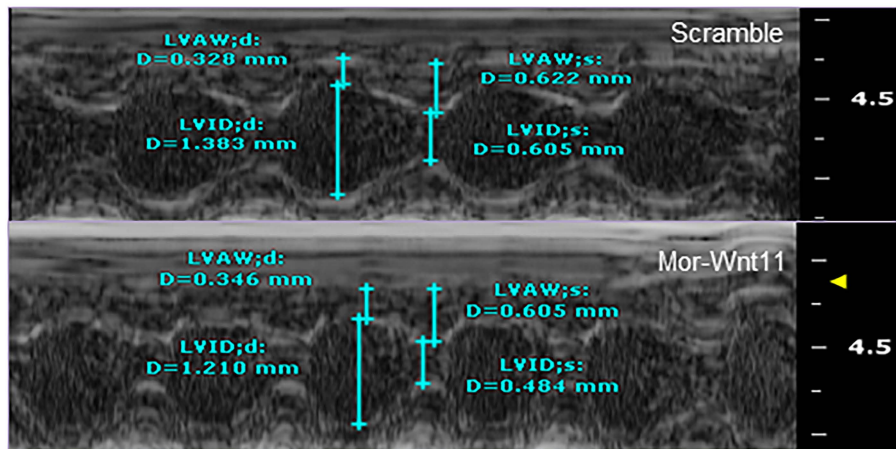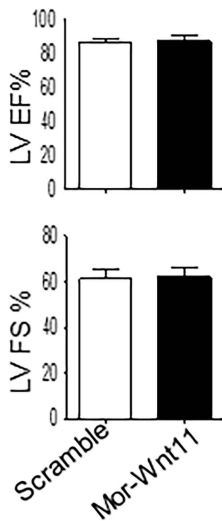

**Supplemental Figure 4. Wnt11 Knockdown by Vivo-Morpholino did not Impact Cardiac Function.**

Representative M-mode echocardiography images of Mor-Wnt11 treated or scramble treated neonatal mouse hearts are displayed. Bar graphs (right): Quantitative analysis of left ventricle (LV) functional indices. N=7 per group. EF: Ejection fraction, FS: Fractional shortening. Error bars represent standard error of means (SEM). \*  $P \leq 0.05$  (unpaired, two tailed Student's *t* test).
